# Supplementary material
Source: PubMed Central journal article supplement (PMC8240134)
Supplement: kaaa104_suppl_supplemental_figure_1.pdf [file kaaa104_suppl_supplemental_figure_1.pdf]

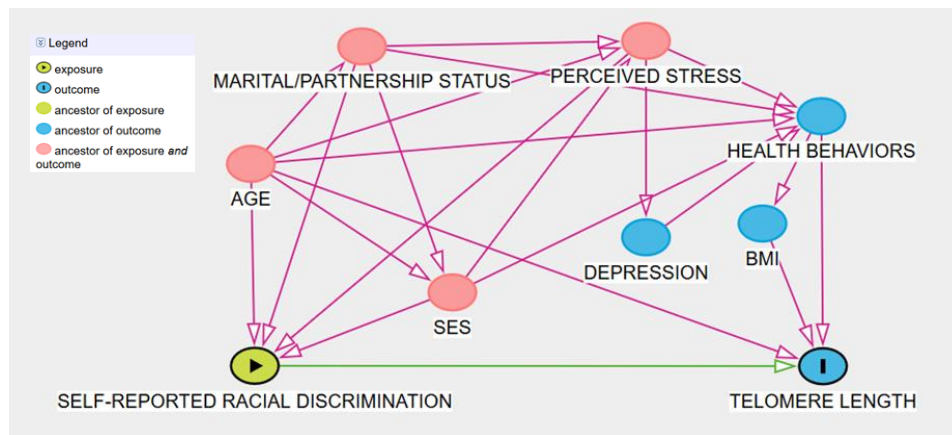

Supplemental Figure 1. Directed acyclic graph representing working knowledge of factors linking self-reported racial discrimination and telomere length in Black women. Depression, health behaviors, and body mass index were identified as mediators (blue circles). Therefore, models were adjusted for confounders (red circles): socioeconomic status, age, marital status, and perceived stress. (Generated using <http://www.dagitty.net/>.)
