# Supplementary material
Source: PubMed Central journal article supplement (PMC8240134)
Supplement: kaaa104_suppl_supplemental_figure_2.pdf [file kaaa104_suppl_supplemental_figure_2.pdf]

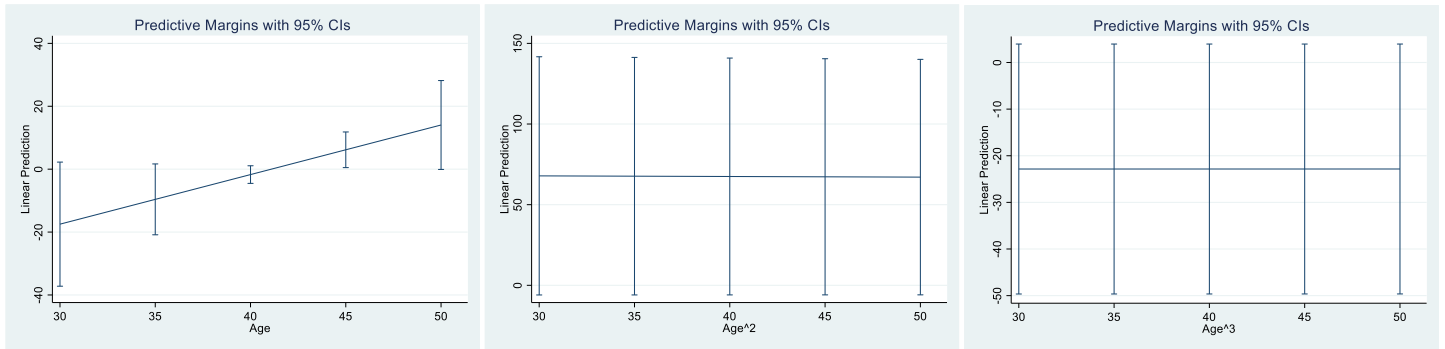

Supplemental Figure 2. Linear regression of institutional racial discrimination (EOD) and age, quadratic age, and cubic age, adjusted for educational attainment, employment status, poverty, marital status, and perceived stress among African American Women’s Heart & Health study participants ( $N=134$ ).
